# Supplementary material
Source: PubMed Central journal article supplement (PMC2861490)
Supplement: NIHMS164570-supplement-Supplement.pdf [file NIHMS164570-supplement-Supplement.pdf]

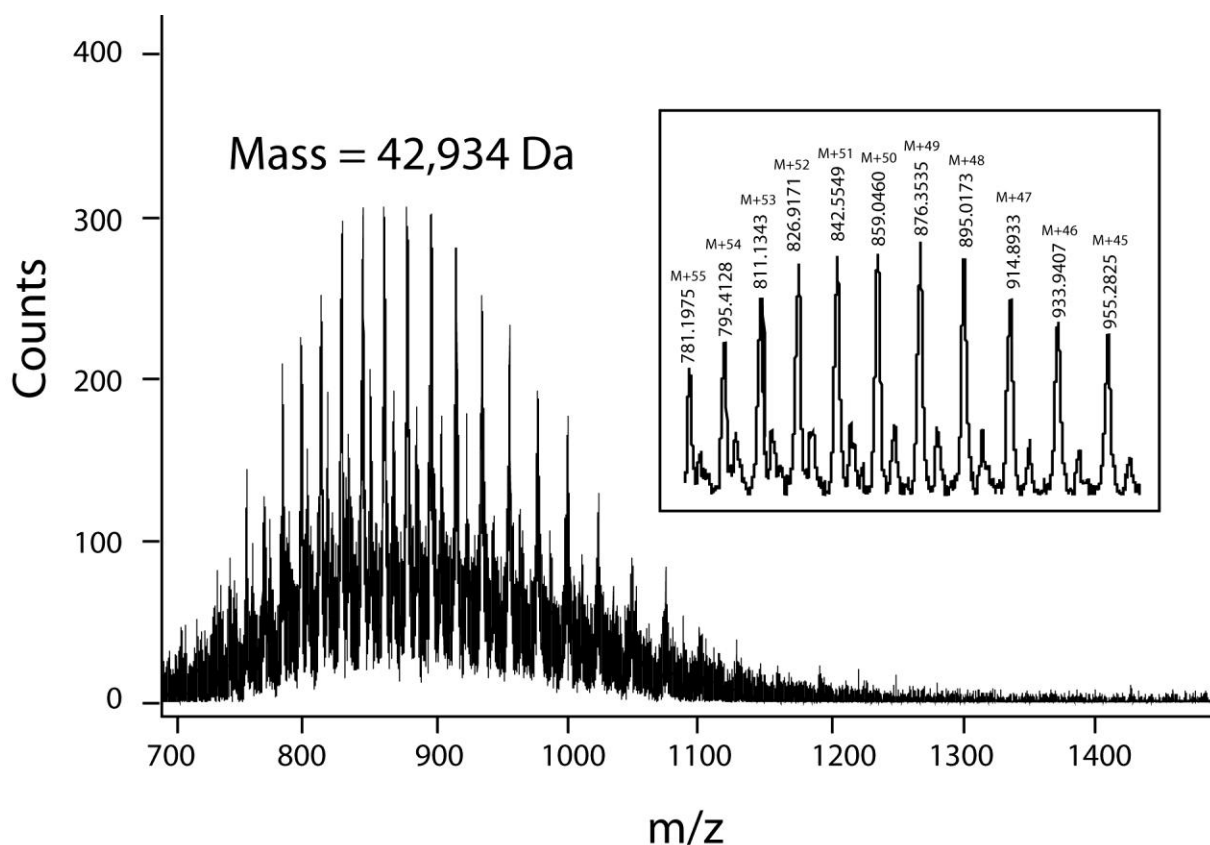

**Figure S1:** Electrospray ionization mass spectroscopy of  $^2\text{H}$ ,  $^{15}\text{N}$  labeled PKA-C grown in media containing 80%  $^2\text{H}_2\text{O}$  and deuterated glucose. The inset displays an enlarged portion of the data which was smoothed and deconvoluted. This shows an ionization pattern for an enzyme which is 99%  $^{15}\text{N}$  labeled and ~95% deuterated with a standard deviation of 0.358 amu based on the peaks shown.

**Table S1:** Representative values from the experimental data compared to predicted values based on the PKA-C mass of 42,934.0133 Da (99%  $^{15}\text{N}$ , 95%  $^2\text{H}$  labeled enzyme).

| Charge | Observed Peak (m/z) | Calculated Mass (Da) | Predicted Peak (m/z) |
|--------|---------------------|----------------------|----------------------|
| 53+    | 811.0820            | 42934.9695           | 811.0829             |
| 52+    | 826.6814            | 42936.0610           | 826.6806             |
| 51+    | 842.7777            | 42931.3004           | 842.7916             |
| 50+    | 859.6655            | 42933.9187           | 859.6674             |

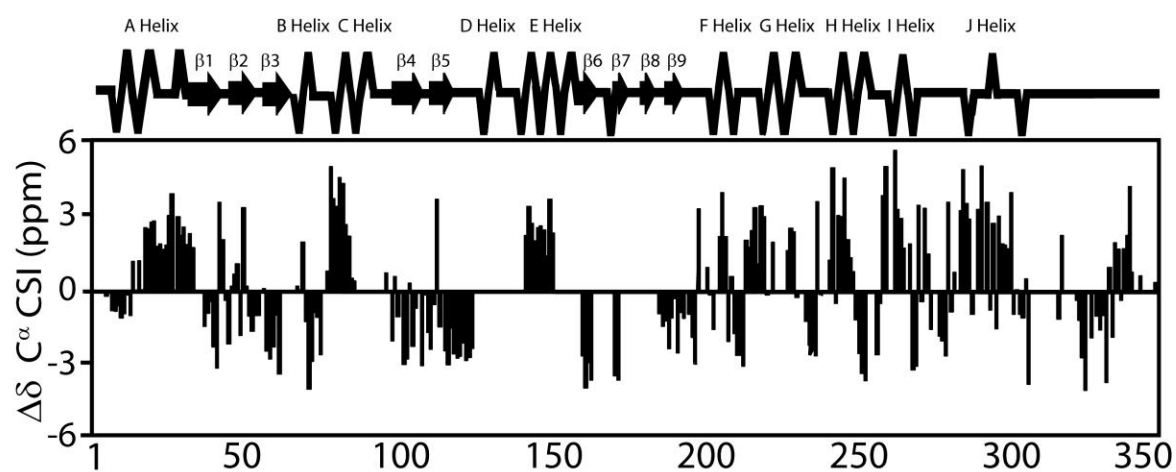

**Figure S2:** Chemical shift index (CSI) values for  $C^\alpha$  resonances assigned in the AMP-PNP bound state of PKA-C
